# Supplementary material
Source: Springer Nature journal article supplement (https://www.springermedizin.de/resource/supplementary/12885_2013_4450_MOESM3_ESM.pdf/9466408)
Supplement: MOESM3 [file 9466408]

## Additional file 3 - Supplementary table 2

### Oligonucleotides for RT-PCR

| Gene                           | Accession number<br>[reference] | Method   | Forward Primer<br>(5' to 3') | Reverse Primer<br>(5' to 3') | Probe<br>(5' to 3')                    |
|--------------------------------|---------------------------------|----------|------------------------------|------------------------------|----------------------------------------|
| <i>TBP</i>                     | X54993 [1]                      | TaqMan   | CACGAACCACGG<br>CACTGATT     | TTTCTTGCTGCC<br>AGTCTGGAC    | TCTTCACTCTGGC<br>TCCTGTGCACA           |
| <i>STAT1</i>                   | NM_007315.3                     | TaqMan   | CATTCACATGGG<br>TGGAGCG      | GGGTTCAACCGC<br>ATGGAAG      | TCCCAGAACGGAG<br>GCGAACCTG             |
| <i>SOCS1</i>                   | NM_003745.1 [2]                 | TaqMan   | TTTTCGCCCTTAG<br>CGTGAAG     | CATCCAGGTGAA<br>AGCGGC       | CCTCGGGACCCAC<br>GAGCATCC              |
| <i>IRF1</i>                    | NM_002198.2                     | TaqMan   | AAGGATGCCTGT<br>TTGTTCCG     | CAGCGAAAGTTG<br>GCCTTC       | CTGGGCCATTCACA<br>CAGGCCGATAC          |
| <i>IFN-<math>\gamma</math></i> | NM_000619.2                     | TaqMan   | CCAACGCAAAGC<br>AATACATGA    | CGTTCCTGTTT<br>TAGCTGC       | ATCCAAGTGATGG<br>CTGAACTGTGCGC         |
| <i>FOXP3</i>                   | NM_014009.3                     | EvaGreen | GGCACAATGTCT<br>CCTCCAGAGA   | CAGATGAAGCCT<br>TGGTCAGTGC   | N/A <sup>a</sup>                       |
| <i>CD68</i>                    | NM_001251.2                     | EvaGreen | CGAGCATCATTC<br>TTTACCAGCT   | ATGAGAGGCAGC<br>AAGATGGAC    | N/A                                    |
| <i>CXCL9</i>                   | NM_002416.1                     | TaqMan   | TTGGGCATCTTG<br>CTGG         | GGAACAGCGACC<br>CTTTCTCA     | TCTGATTGGAGTGC<br>AAGGAACCCCAGT<br>A   |
| <i>CXCL10</i>                  | NM_001565.3                     | TaqMan   | TGAAATTATTCC<br>TGCAAGCCAAT  | CAGACATCTCTT<br>CTCACCTTCTTT | TGTCCACGTGTTGA<br>GATCATTGCTACAA<br>TG |
| <i>CXCL11</i>                  | NM_005409.4                     | TaqMan   | CCTTGGCTGTGA<br>TATTGTGTGC   | CCTATGCAAAGA<br>CAGCGTCCT    | CAGTTGTTCAAGGC<br>TTCCCCATGTTCA        |
| <i>IFIT1</i>                   | NM_001548.4 [3]                 | EvaGreen | TTGCCTGGATGT<br>ATTACCAC     | GCTTCTTGCAA<br>TGTTCTCC      | N/A                                    |
| <i>IFITM1</i>                  | NM_003641.3 [3]                 | EvaGreen | TCTTCTTGA<br>GGTGCTGTC       | GTCGGAACCAT<br>CTTCCTGT      | N/A                                    |
| <i>MX1</i>                     | NM_001144925.1<br>[3]           | EvaGreen | AGGACCATCGGA<br>ATCTTGAC     | TCAGGTGGAACA<br>CGAGGTTC     | N/A                                    |
| <i>PD-1</i>                    | NM_005018.2                     | EvaGreen | GTGTCACACAAC<br>TGCCCAAC     | CTGCCCTTCTCTC<br>TGTCACC     | N/A                                    |
| <i>CD163</i>                   | NM_004244.5                     | EvaGreen | TTGCCAGCAGCT<br>TAAATGTG     | AGGACAGTGTTT<br>GGGACTGG     | N/A                                    |
| <i>PD-L1</i>                   | NM_014143.3                     | EvaGreen | TATGGTGGTGCC<br>GACTACAA     | TGCTTGTCCAGA<br>TGACTTCG     | N/A                                    |
| <i>PD-L2</i>                   | NM_025239.3                     | EvaGreen | CTGGGTTGGAGC<br>TACTGCAT     | GCAATTCCAGGC<br>TCAACATT     | N/A                                    |

<sup>a</sup>N/A, not applicable

### References

1. Bieche I, Onody P, Laurendeau I, Olivi M, Vidaud D, Lidereau R, Vidaud M: **Real-time reverse transcription-PCR assay for future management of ERBB2-based clinical applications.** *Clin Chem* 1999, **45**(8 Pt 1):1148-1156.
2. Haffner MC, Petridou B, Peyrat JP, Revillion F, Muller-Holzner E, Daxenbichler G, Marth C, Doppler W: **Favorable prognostic value of SOCS2 and IGF-I in breast cancer.** *BMC Cancer* 2007, **7**:136.
3. Schild-Hay LJ, Leil TA, Divi RL, Olivero OA, Weston A, Poirier MC: **Tamoxifen induces expression of immune response-related genes in cultured normal human mammary epithelial cells.** *Cancer Res* 2009, **69**(3):1150-1155.
